# Supplementary material
Source: PubMed Central journal article supplement (PMC5875323)
Supplement: jamapediatr-172-e180030-s001.pdf [file jamapediatr-172-e180030-s001.pdf]

## Supplementary Online Content

Miura M, Kobayashi T, Kaneko T, et al; the Z-score Project 2nd Stage (ZSP2) Study Group. Association of severity of coronary artery aneurysms in patients with Kawasaki disease and risk of later coronary events. *JAMA Pediatr*. Published online March 5, 2018.  
doi:10.1001/jamapediatrics.2018.0030

**eFigure 1.** Kaplan-Meier survival curves for coronary events classified by the actual internal diameter of coronary artery aneurysms in male and female patients

**eFigure 2.** Kaplan-Meier survival curves for major severe cardiac events classified by the actual internal diameter of coronary artery aneurysms in male and female patients

This supplementary material has been provided by the authors to give readers additional information about their work.

**eFigure 1.** Kaplan-Meier survival curves for coronary events classified by the actual internal diameter of coronary artery aneurysms in male and female patients

Coronary event-free survival rate

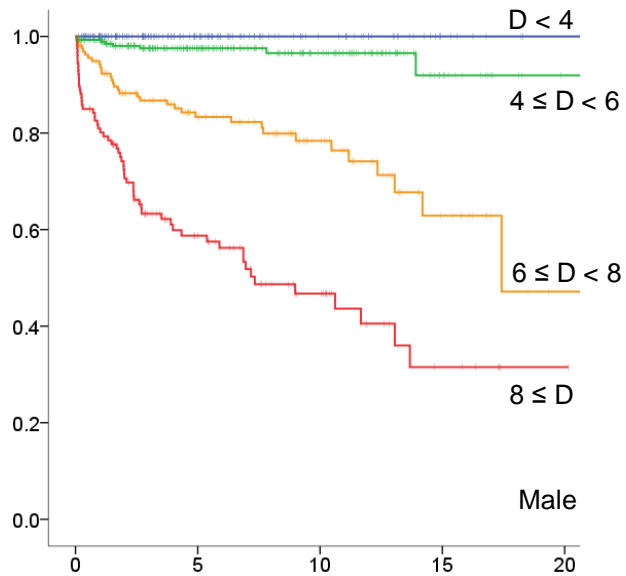

Number at risk

|           |     |     |    |    |   |
|-----------|-----|-----|----|----|---|
| D < 4     | 144 | 65  | 28 | 7  | 1 |
| 4 ≤ D < 6 | 279 | 146 | 72 | 14 | 1 |
| 6 ≤ D < 8 | 159 | 89  | 43 | 12 | 1 |
| 8 ≤ D     | 127 | 49  | 22 | 6  | 1 |

Time after diagnosis (years)

Coronary event-free survival rate

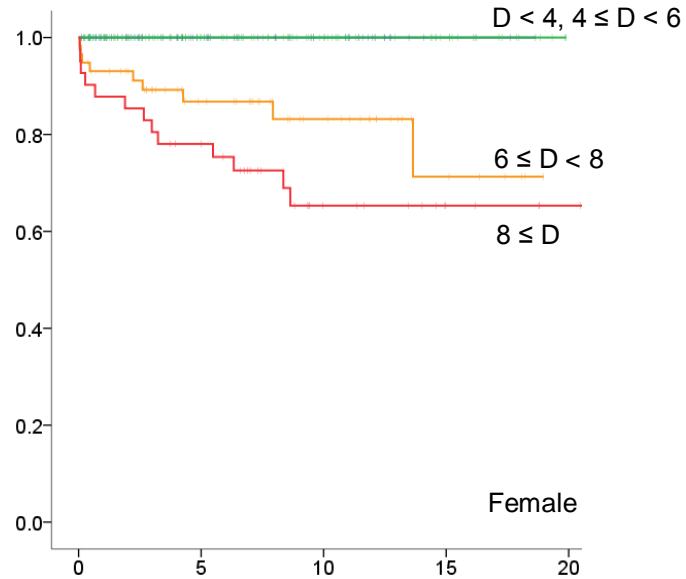

Number at risk

|                  |     |    |    |    |   |
|------------------|-----|----|----|----|---|
| D < 4, 4 ≤ D < 6 | 56  | 26 | 15 | 2  | 0 |
| 6 ≤ D < 8        | 132 | 67 | 35 | 15 | 0 |
| 8 ≤ D            | 58  | 34 | 19 | 6  | 0 |
| 8 ≤ D            | 41  | 29 | 13 | 6  | 3 |

Time after diagnosis (years)

The survival curves were significantly different among the four groups ( $P < .001$ , log rank test of equality). Severity classification was based on < 4 mm, ≥ 4 to < 6 mm, ≥ 6 to < 8 mm, and ≥ 8 mm of the actual internal diameter (D) of coronary artery aneurysms.

**eFigure 2.** Kaplan-Meier survival curves for major severe cardiac events classified by the actual internal diameter of coronary artery aneurysms in male and female patients

Major adverse cardiac event-free survival rate

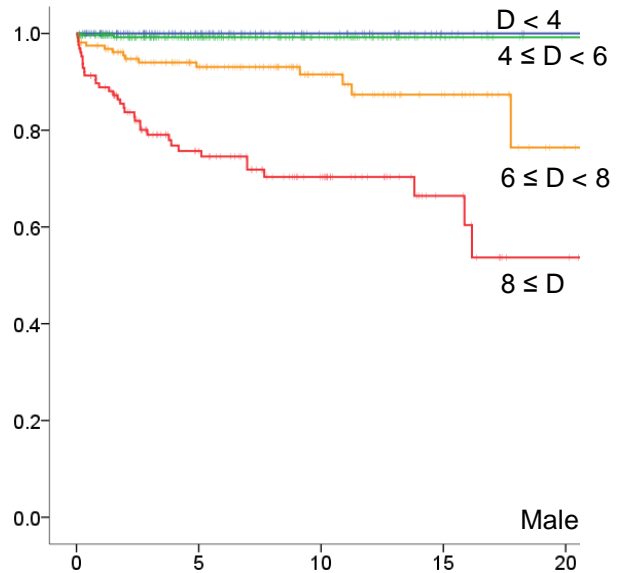

Number at risk

|           |     |     |    |    |   |
|-----------|-----|-----|----|----|---|
| D < 4     | 144 | 65  | 28 | 7  | 1 |
| 4 ≤ D < 6 | 279 | 149 | 73 | 14 | 1 |
| 6 ≤ D < 8 | 159 | 100 | 52 | 21 | 2 |
| 8 ≤ D     | 127 | 66  | 37 | 12 | 3 |

Time after diagnosis (years)

Major adverse cardiac event-free survival rate

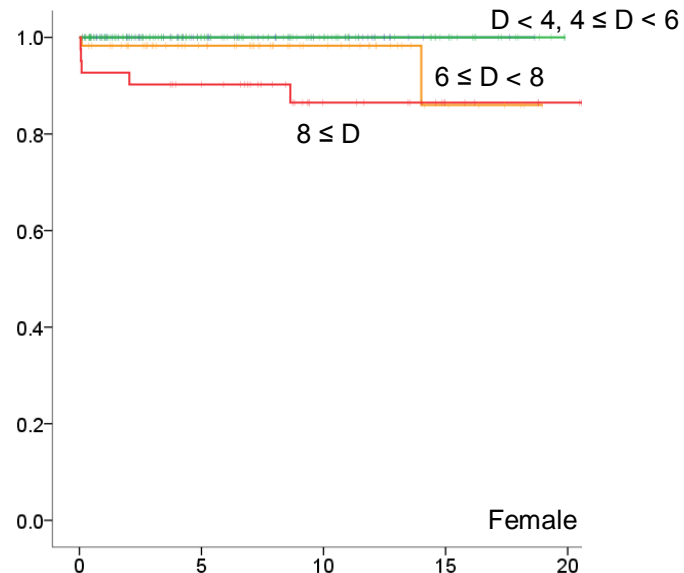

Number at risk

|           |     |    |    |    |   |
|-----------|-----|----|----|----|---|
| D < 4     | 56  | 26 | 15 | 2  | 0 |
| 4 ≤ D < 6 | 132 | 67 | 35 | 15 | 0 |
| 6 ≤ D < 8 | 58  | 37 | 20 | 6  | 0 |
| 8 ≤ D     | 41  | 33 | 16 | 7  | 3 |

Time after diagnosis (years)

The survival curves were significantly different among the four groups ( $P < .001$ , log rank test of equality). Severity classification was based on  $< 4$  mm,  $\geq 4$  to  $< 6$  mm,  $\geq 6$  to  $< 8$  mm, and  $\geq 8$  mm of the actual internal diameter (D) of coronary artery aneurysms.
